# Supplementary material for: Synthesis and bioactivity of labelled germination stimulants for the isolation and identification of the strigolactone receptorElectronic supplementary information (ESI) available: Nitration of (+)-4, preparation of (+)-5, rac-7 and rac-8, details of the X-ray analysis of (+)-8. See http://www.rsc.org/suppdata/ob/b2/b210678g/
Source: Royal Society of Chemistry journal article supplement (doi:10.1039/b210678g), 2003-02-24
Supplement: b210678g.doc [file b210678g.doc]

**Supplementary** **data**

**Synthesis and Bioactivity of Labelled Germination Stimulants for the Isolation and Identification of the Strigolactone Receptor**

## **Anat Reizelman, Suzanne C. M. Wigchert, Cinzia del-Bianco and Binne Zwanenburg***

*Department of Organic Chemistry, NSR Center for Molecular Structure, Design and Synthesis, University of Nÿmegen, Toernooiveld 1, 6525 ED Nÿmegen, The Netherlands.*

*Tel: +31-24-3653159; Fax +31-24-3653393; E-mail: zwanenb@sci.kun.nl*

**7-Nitro-3,3a(*S*),4,8b(*R*)-tetrahydro-2H-indeno[1,2-b]furan-2-one**

Tricyclic lactone **(+)-4** (3.25 g, 18.7 mmol) was nitrated as described by Thuring *et al*20 .Recrystallization from toluene afforded pale yellow needles. Yield: 75%. Mp: 119-120°C. []22D +207.8 (c=0.4, CH2Cl2). All other analytical data were identical with those reported previously for the racemic compound.20

***tert*-Butyl *N*-[oxo-3,3a(*S*),4,8b(*R*)-tetrahydro-2H-indeno[1,2-b]furan-7-yl]carbamate (+)-5**

Boc-amino tricyclic lactone **(+)-5** was prepared in the same way as **(-)-5**, starting from 7-nitro-3,3a(*S*),4,8b(*R*)-tetrahydro-2H-indeno[1,2-b]furan-2-one derived from **(+)**-**4** (3.0 g, 15.9 mmol).An analytically pure sample was obtained by recrystallilization from hexane/ethyl acetate. Yield 87%. []22D +160.2° (c=0.4, CH2Cl2). Anal. calcd. for C16H19O4N: C, 66.42; H, 6.62; N, 4.84 found: C, 66.23; H, 6.57; N, 4.88. All other analytical data were the same as reported for carbamate **(-)-5**.

***tert*-Butyl *N*-[3-((*E*)-1-{[4’-methyl-5’-oxo-2’,5’-dihydro-2’(*RS*)-furanyl]oxy}methylidene)-2-oxo-3,3a(*RS*),4,8b(*SR*)-tetrahydro-2H-indeno[1,2-b]furan-7-yl]carbamate (rac.7)** and its 2(S)diastereoisomer: ***tert*-Butyl *N*-[3-((*E*)-1-{[4’-methyl-5’oxo-2’,5’-dihydro-2’(*SR*)-furanyl]oxy}-methylidene)-2-oxo-3,3a(*RS*), 4,8b(*SR*) -tetrahydro-2H-indeno[1,2-b]furan-7-yl]carbamate (**rac**- 8)**

Racemic Boc-amino-GR24 diastereoisomers rac**-7** and rac**-8** were prepared in the same way as described for optically pure compounds **(-)-7** and **(-)-8**, starting from carbamate rac**-5** (1.0 g, 3.46 mmol). Yield: fast moving diastereoisomer rac**-7**: 39%; slow moving diastereoisomer rac**-8**: 37%. All analytical data were the same as reported for the corresponding enantiopure carbamates.

*X-ray crystallography.* Crystals of **(+)-8,** suitable for X-ray diffraction studies, were obtained by slow evaporation from 2-methyl-2-butanol. A single crystal was mounted in air on a glass fiber. Intensity data were collected at room temperature. An Enraf-Nonius CAD4 single crystal diffractometer was used, CuKradiation, -2scan modeUnit cell dimensions were determined from the angular setting of 25 reflections. Intensity data were corrected for Lorentz and polarization effects. Semi-empirical absorption correction (-scans) was applied. The structure was solved by the program CRUNCH and was refined using standard methods (refinement against F2 of all reflections with SHELXL-97) with anisotropic parameters for the non-hydrogen atoms. All hydrogens were initially placed at calculated positions and were freely refined subsequently. Relevant numerical data were collected: table 2.

**Table 2** Crystal data and Structure refinement for slow moving BocNH-GR24 diastereoisomer **(+)-8**

| empirical formula  formula weight  crystal colour  crystal shape  crystal size  temperature  radiation/wave length  crystal system/space group  unit cell dimensions  (25 reflections 22.177<<45.115)  volume  Z/calculated density  absorption coefficient  diffractometer/scan  F(000)  range for data collection | C22H23NO7  413.41  transparent colourless  regular rod  0.42 0.12  0.11 mm  293(2) K  CuK (graphite monochrom.)/1.54184 Å  orthorhombic/P212121  a = 9.3201(4) Å  b = 12.5782(4) Å  c = 17.9679(4) Å  2106.38(11) Å3  4/1.304mg/m3  0.815mm-1  Enraf-Nonius CAD4/  872  4.29 to 69.94 | index range  reflections  collected/unique  reflections observed  absorption correction  range of relat. transm. factors  refinement method  computing  data/restraints/para-  meters  goodness-of-fit on F2  SHELXL-97 weight  parameters  final R indices  [I>2  final R indices  (all data)  extinction coefficient  largest diff. peak and hole | 0 h 11,  0 k 15, 0 k 21,  2282/2282  1967([I0>2(I0)])  semi-empirical from scans  1.055 and 0.960  full-matrix least squares on F2  SHELXL-9731  2282/0/364  1.048  0.077600 and 0.140500  R1=0.0398,  wR2=0.1093  R1=0.0485,  wR2=0.1169  0.0023(4)  0.192 and –0.178e. Å3 |
| --- | --- | --- | --- |
